# Supplementary material
Source: publisher figshare collection journal article supplement (https://sage.figshare.com/ndownloader/files/21865137)
Supplement: Supplementary file 1 [file 21865137]

**Supplemental material**

Table : Components of the Orthodontic Treatment Patient Satisfaction Questionnaire (note – patient-friendly terms were used in the questionnaire but technical terms have been used to describe the questionnaire for clarity).

| Section 1: Pre-treatment experience | | |
| --- | --- | --- |
| Q1 | **Problems:** Spacing, alignment, overjet, overbite, supernumerary teeth, hypodontia, ectopic teeth | 3-point scale (none, a bit, a lot) |
| Q2 | **Symptoms:** pain, sleeping, eating, cleaning, speaking, health, embarrassment smiling, embarrassment eating, teasing/bullying, sad / unhappy with teeth | 3-point scale (none, a bit, a lot) |
| Q3 | **Expectations from treatment:** reduction in pain, embarrassment smiling, embarrassment eating, teasing/bullying, improvement in sleeping, eating, cleaning, speaking, health, psychological | 3-point scale (none, a bit, a lot) |
| Q4 | **Provision of information:** length of time, type of treatment, self-care required, type of retainer, length of retention | Dichotomous  (Yes / No) |
| Q5 | Type of information: verbal, written | Dichotomous  (Yes / No) |
| Section 2: Experience of treatment | | |
| Q6 | **Comfort of specific treatments:** extractions, impressions, fitting/wearing removable/fixed appliance, adjustments, headgear, debond, retainer fitting | 5-point scale  (Not – Very comfortable) |
| Q7 | **Problems:** repeat impressions, fixed/removable appliance breakage, retainer breakage, sore mouth, gingival issues | Dichotomous  (Yes / No) |
| Q8 | **Experience of treatment:** pain, impact on eating, sleeping or speaking, time off work, health problems, embarrassment smiling or eating, teasing/bullying, psychological | 5-point scale  (Very much – Not at all) |
| Section 3: Outcome from treatment | |  |
| Q9 | **Change in pre-treatment problem:** Spacing, alignment, overjet, overbite, position of teeth, ectopic teeth | 3-point scale (worse – no different – better) |
| Q10 | **Change in symptoms:** Pain, sleeping, eating, cleaning, speaking, health, embarrassment smiling, embarrassment eating, teasing/bullying, psychological | 3-point scale (worse / no different – better) |
| Q11 | **Satisfaction:** own, family, friends, would have orthodontic treatment again, would recommend orthodontic treatment | 3-point scale  (Not at all – Very much) |
| Q12 | Patient views of   - Dental problems - Orthodontic treatment - Experience of orthodontic services - Comments to others | Free text |

**Table 2: Comments provided by respondents in the free text boxes at the end of the questionnaire**

| **Experience of dental problems** |
| --- |
| *“Very sensitive teeth, overlapped and crooked”*  *“Adult teeth didn’t come through”*  *“I had treatment because of how my teeth looked, crooked and large overbite”*  *“Crowding, receding jaw made me self-conscious”*  *“My teeth were healthy but not straight, problems with confidence mainly”*  *“Bad at first and smiling was embarrassing, resolved after this treatment”* |
| **Orthodontic treatment** |
| | *“Worth time and discomfort”* | | --- | | *“The best thing to do, great value for money”* | | *“It works but is painful, I am happy with my teeth now but it was a lot of pain and I didn’t know exactly what was being done to my teeth which was a bit scary”* | | *“Fantastic, I've had a good outcome and my teeth are perfect”* | | *“Excellent”* | | *“Worked really well, had fixed brace and was worried it wouldn’t work but it did, ortho experience”* | | *“Very easy to deal with”* | | *“Very effective and dentists were reassuring and friendly”* | | *“Very good”* | | *“Fantastic”* | | *“Worth all the visits to have straight teeth”* | | *“Amazing”* | | *“Fantastic however long process but worth it”* | | *“Good”* | | *“Very worthwhile”* | | *“I am happy with how they explained everything to me and it was quite friendly”* | | *“Very positive and helpful”* | | *“Okay, a bit confusing”* | | *“Well managed, regular check ups really helped”* | | *“Very good”* | | *“I am happy I had this treatment”* | | *“Professional and extremely skilled”* | | *“Excellent, changed my life forever”* | | *“Really good at helping your teeth be straighter”* | | *“Very good, knew exactly what they were doing”* | |
| **Experience of orthodontic services** |
| | *“Friendly, helpful and reassuring”* | | --- | | *“Well organised, easy to get appointments and excellent”* | | *“I couldn’t have had a better experience”* | | *“Very good and pleased with end result”* | | *“Very lovely staff”* | | *“I was left with a gap on my birthday and a pointed front tooth for prom”*  *“It was difficult to say if I felt uncomfortable or in pain sometimes, but the staff did want to help”* | | *“Everyone very sociable and polite”* | | *“Really good”* | | *“Staff were really helpful and gave great instructions”* | | *“Worked really well, had fixed brace and was worried it wouldn’t work but it did. Great services , everyone listened and told me it was important”* | | *“Very effective and dentists were reassuring and friendly. Fast and effective”* | | *“Overall good”*  *“Extraordinary”* | | *“Worth all the visits to have straight teeth. Very good experience”* | | *“[Orthodontist] was incredible and she is partly the reason I felt confident enough to say no to jaw surgery (which was purely for cosmetic reasons)”* | | *“Slow, not very comfortable could be more friendly when asking if it hurts”* | | *“I quickly realised it wasn’t the treatment being done that hurt, it was how the treatment was being individually done that hurt.”* | | *“The staff are very helpful and kind”* | | *“Fantastic experience, service was wonderful”* | | *“I’ve learned a lot from these treatments”* | | *“Always positive, amazing results”* | | *“Getting new retainers hurt, but it’s worth it”* | | *“Sharp wires after tightening”* | | *“Loved the experience, great explanations from [Orthodontist]”* | | *“I had an open bite which I didn’t think could be sorted without jaw surgery, did not need surgery thankfully. Staff were amazing, really caring and professional”* | | *“The service has been brilliant”* | | *“Very friendly”* | | *“Major part of my experience was not feeling good about how I looked. Brilliant, very supportive throughout”* | | *“Importance of interdental cleaning emphasised”* | | *“Well looked after, excellent service”* | | *“It was a good experience”* | | *“I have had a great experience with minimal problems, couldn’t have asked for a better team”* | | *“Better than expected”* | |
| **What I would tell others about my orthodontic treatment** |
| | *“Staff put you at ease”* | | --- | | *“Well worth the years of braces on”* | | *“Best thing I have done”* | | *“I would recommend it”* | | *“It was horrible and I didn’t enjoy it but I do have nice teeth now so I guess it was worth it”* | | *“Recommend as they transformed my teeth”* | | *“Not to be scared”* | | *“Definitely do it”* | | *“It was painful at first, but worth it in the end and not as scary as I thought”* | | *“Go for a brace if needed, long process but worth it”* | | *“I would recommend it”* | | *“Very good and helped my confidence”* | | *“Would definitely tell others to get ortho treatment”* | | *“It was worth it”* | | *“Have it done, I actually enjoyed it”* | | *“Fantastic”* | | *“Efficient, amazing and clean very thorough at making sure my teeth were getting better”* | | *“I am so happy that my teeth are finally straight”* | | *“Worth doing”* | | *“Worth the process”* | | *“Not really worth it, still have gaps”* | | *“Tightening hurts but everything else is fine”* | | *“Good and would recommend”* | | *“Very good, excellent, go for it”* | | *“Very friendly, reassuring and kept us well informed”* | | *“I would recommend 100%”* | | *“If needed, absolutely have it done”* | | *“A long very tough journey but very worthwhile, important to be patient even though progress is slow”* | | *“I had treatment and it worked well”* | | *“I would encourage others to get treatment makes you feel better about yourself”* | | *“Don’t worry it’s worth it in the end”* | | *“Would recommend”* | |

**Figure 1: Patient-reported pre-treatment concerns**

1. **by age group**
2. **by care setting**

**Figure 2: Patient-reported expectations from treatment**

1. **by age group**
2. **by care setting**

**Figure 3: Recall of pre-treatment information**

1. **by age group**
2. **by care setting**

**Figure 4: Procedures reported as ‘Not comfortable’**

1. **by age group**
2. **by care setting**

**Figure 5: Patient-reported complications during orthodontic treatment**

1. **by age group**
2. **by care setting**

**Figure 6: Patient-reported negative impact during treatment**

1. **by age group**
2. **by care setting**

**Figure 7: Patient-reported improvement from orthodontic treatment**

1. **by age group**
2. **by care setting**
